1 Terrestrial landscape impacts the biogeographic pattern of soil *Escherichia coli* via altering the strength  
2 of environmental selection and dispersal

3

4 Jingqiu Liao<sup>a, b</sup>, Peter Bergholz<sup>c</sup>, Martin Wiedmann<sup>a#</sup>

5

6 Department of Food Science, Cornell University, Ithaca, NY 14853<sup>a</sup>; Graduate Field of Microbiology,  
7 Cornell University, Ithaca, NY 14853<sup>b</sup>; Department of Microbiological Sciences, North Dakota State  
8 University, Fargo, ND 58105<sup>c</sup>

9

10 Running Head: Effects of landscape on the distribution of *E. coli*

11

12 # Address correspondence to Martin Wiedmann, [martin.wiedmann@cornell.edu](mailto:martin.wiedmann@cornell.edu)

13

14 **ABSTRACT** High-quality habitats for wildlife (e.g., forest) provide essential ecosystem services while  
15 increasing species diversity and habitat connectivity. Unfortunately, presence of such habitats adjacent  
16 to produce fields may increase risk for contamination of fruits and vegetables by enteric bacteria,  
17 including *Escherichia coli*. *E. coli* survives in extra-host environments (e.g., soil) and could disperse  
18 across landscapes by wildlife. Understanding how terrestrial landscapes impact the distribution of soil *E.*  
19 *coli* is of importance in assessing the contamination risk of agricultural products. Here, we compared the  
20 distribution of *E. coli* isolated from soils from two watersheds with different landscape patterns in  
21 central New York, USA, and examined the influences of two ecological forces - environmental selection  
22 and dispersal - on the distribution of *E. coli*. Results showed that for the watershed with widespread  
23 produce fields, sparse forests, and limited interaction between the two land types, *E. coli* composition  
24 was significantly different between produce field and forest; this distribution was shaped by relatively  
25 strong environmental selection likely triggered by soil phosphorus and antimony. For the watershed with  
26 more forested areas and stronger interaction between produce field and forest, *E. coli* composition  
27 between these two land types was relatively homogeneous; this distribution was a consequence of weak  
28 selective pressure potentially from soil moisture and wildlife-driven dispersal by small flocking  
29 insectivore/granivores and large nuisance wildlife, which were identified as potential vehicles by  
30 competing models. Collectively, our results suggest that terrestrial landscape could drive the  
31 biogeographic pattern of enteric bacteria by adjusting the balance between environmental selection and  
32 dispersal.

33 **IMPORTANCE** Understanding the ecology of enteric bacteria in extra-host environments is important  
34 to allow for development and implementation of strategies to minimize pre-harvest contamination with  
35 enteric pathogens. Our findings suggest that watershed landscape is an important factor influencing the  
36 ecological drivers and transmission pattern of *E. coli*. For watersheds with widespread produce fields, *E.*

37 *coli* appears to experience local adaptation, likely due to exposure to environmental stresses possibly  
38 associated with agricultural activities. In contrast, for watersheds with high forest coverage we found  
39 evidence for wildlife-driven dispersal of *E. coli*, which might facilitate more frequent genetic exchange  
40 in this environment. Agricultural areas in such watersheds may have a higher risk of produce  
41 contamination due to less environmental constraints and higher potential of transmission of enteric  
42 bacteria between locations. The significance of our research lies in exploring ecological principles  
43 underlying the biogeographic pattern of enteric bacteria at the regional level, which can inform  
44 agricultural, environmental and public health policies that aim to reduce the risk of food contamination  
45 by enteric bacteria.

46 **KEYWORDS** enteric bacteria, landscape, environmental selection, dispersal, wildlife

47

## 48 **INTRODUCTION**

49 Forests and other riparian buffers can provide ecological benefits (e.g., reducing soil erosion and  
50 leaching of chemical and fecal waste into ground water sources, providing habitat and connective  
51 pathways for wildlife) as well as aesthetic benefits (1–3). While high quality habitats (e.g., forest) offer  
52 conservation services, they may also bring unintended consequences and may increase the risk of pre-  
53 harvest contamination of produce crops. For one, extra-host environments, such as soil in high quality  
54 habitats, can be critical reservoirs for enteric bacteria, leading to potential transmission of enteric  
55 bacteria to adjacent agricultural regions (4). Direct fecal deposition onto produce by wildlife is another  
56 source of enteric bacteria in agricultural regions (5). By providing wildlife movement pathways, high  
57 quality habitats may facilitate the wildlife-driven dispersal of enteric bacteria through riparian buffers to  
58 adjacent agricultural regions, possibly resulting in contamination of food crops (6–9). Subsequent  
59 persistence and regrowth of the pathogenic enteric bacteria introduced in fresh produce would then lead

60 to a food safety risk (10). Since the survival of enteric bacteria and movement of wildlife vary by land  
61 use types (11, 12), it is reasonable to hypothesize that watershed landscape impacts the distribution of  
62 enteric bacteria.

63 Environmental selection and dispersal are two fundamental ecological forces that drive the  
64 distribution of bacteria (13–16). The essential roles of environmental selection via abiotic (e.g., pH,  
65 salinity) and biotic selective pressures on bacteria have been well documented in many local and even  
66 global habitats (17–20). Environmental selection could facilitate the genetic divergence of some  
67 ecophysiological traits owing to their contribution to fitness benefits for adaptation of bacteria to diverse  
68 habitats, such as those with different land cover types (21, 22). With the influence of environmental  
69 selection, a high level of bacterial diversity can be maintained among locations in a wide range of  
70 environments (15, 23, 24). The role of dispersal in driving the distribution of bacteria at local as well as  
71 regional scales is evident since dispersal provides a mechanism for bacteria to colonize new habitats (25,  
72 26). Its importance on the distribution varies among microbial taxa due to diversity in the capacity of  
73 bacteria to disperse via wind, water, and wildlife. For example, bacteria with a highly successful  
74 dispersal capacity (e.g., *Polaromonas*) tend to exhibit a more global distribution (27), while bacteria  
75 with a poor dispersal capacity (e.g., *Rhizobiaceae*, *Bradyrhizobiaceae*, *Xanthomonadaceae*) tend to have  
76 a more specialized distribution (15). Importantly, wildlife presence and movement is fundamentally  
77 affected by the physical elements and features of land (15). Thus, wildlife-driven dispersal of bacteria.  
78 can be quantitatively predicted by landscape ecological methods based on the relationship of wildlife  
79 behaviors and landscape characteristics (e.g., patchiness, land-use interspersion, patch connectivity,  
80 patch diversity, and land-use interactions) (8, 28–30). Based on these principles, investigating  
81 environmental selection and dispersal of enteric bacteria from and within habitats with distinct  
82 landscape patterns has the power to elucidate the role of terrestrial landscapes in impacting the

83 distribution of enteric bacteria and assess the associated risk of preharvest contamination of food by  
84 pathogenic enteric bacteria.

85         As a commensal and pathogenic enteric bacterium widespread in diverse habitats, *Escherichia*  
86 *coli* primarily resides in the intestines of warm-blooded animals, and survives in extra-host  
87 environments such as water, soil, sediments as well (31, 32). Soil is a habitat of particular interest for *E.*  
88 *coli*, since the high chemical and physical heterogeneity of soil across different environments could pose  
89 environmental selection of varying strengths on *E. coli* (22, 23, 32). Observations that the prevalence of  
90 *E. coli* varies by land cover types (e.g., deciduous forest, cropland, pasture) (22), also suggests that  
91 different land uses could stimulate different types and intensities of selective pressures that act on *E. coli*.  
92 The key edaphic variables influencing the growth of *E. coli* in soil are commonly recognized as pH and  
93 moisture (23, 33), while some other soil properties such as organic matter and texture could also play a  
94 role (10). In addition, wildlife, such as avian species and ruminant animals, could act as dispersal  
95 vehicles of *E. coli* (34, 35). *E. coli* can also be transmitted between wildlife hosts through contact and  
96 can be deposited in new locations (e.g., produce fields) by defecation, which often happens when  
97 wildlife forages for food (36). Given the intensive interaction with both extra-host and host habitats, *E.*  
98 *coli* may be an useful model for the mechanistic understanding how terrestrial landscape affects the  
99 distribution of enteric bacteria overland. Such an understanding is particularly important for land with  
100 agricultural environments present, as it could be used to develop better strategies for minimizing  
101 pathogen introduction into preharvest environments, particularly those used to grow produce and fruits.

102         We hypothesize that the importance of environmental selection and dispersal for the distribution  
103 of *E. coli* is dependent on landscape; *E. coli* in watersheds with higher coverage of agricultural  
104 environments is strongly driven by environmental selection associated with agricultural activity, while *E.*  
105 *coli* in regions with higher coverage of natural environment is largely influenced by wildlife-driven

106 dispersal. To test our hypothesis, we characterized 938 commensal *E. coli* isolates obtained from soil  
107 samples collected from two watersheds - Flint Creek and Hoosic River, both located in the central New  
108 York region, using a hierarchical multi-locus sequence typing (MLST) scheme. These two watersheds  
109 represent an interesting comparison between one with widespread produce fields and limited interaction  
110 between produce fields and forest (Flint Creek; 69% produce field, 12% forest by area;  
111 adjacency<sub>produce|forest</sub> = 23%; Fig. 1a) and one with heavily forested areas and strong interaction between  
112 produce fields and forest (Hoosic River; 28% produce field, 38% forest by area; adjacency<sub>produce|forest</sub> =  
113 36%; Fig. 1b). Next, we quantitatively assessed the importance of environmental selection via abiotic  
114 pressure from soil and dispersal limitation for *E. coli* in these two watersheds. Last, we developed  
115 dispersal models for four wildlife vehicle candidates (large nuisance wildlife species, small mammals,  
116 small flocking insectivore/granivores, and migratory bird flocks) to understand the role of wildlife-  
117 driven dispersal for *E. coli*.

118

## 119 RESULTS

120 **Distribution of *E. coli*.** Soil samples from Flint Creek (predominated by produce fields) showed  
121 considerably lower prevalence of *E. coli* than soil samples from Hoosic River (predominated by forests);  
122 35% and 72% of soil samples, respectively, were positive for *E. coli* in these two watersheds. These  
123 samples yielded 289 and 649 *E. coli* isolates, respectively. Based on initial 2-gene MLST (*mdh* and  
124 *uidA*), a total of 138 isolates from Flint Creek and 277 isolates from Hoosic River were selected for  
125 characterization by full 7-gene MLST (*aspC*, *clpX*, *icd*, *lysP*, *fadD*, in addition to *mdh* and *uidA*). The 7-  
126 gene MLST generated 122 unique multilocus sequence types (ST) for Flint Creek and 181 unique ST for  
127 Hoosic River (Table S1, Table S2). Analysis by goeBURST identified 96 and 108 *E. coli* clonal groups  
128 for Flint Creek and Hoosic River, respectively, based on ST at single locus variant level (Fig. S1, Fig.

129 S2). While *E. coli* clonal group richness did not differ significantly between forest sites and produce  
130 field sites for both watersheds, for Flint Creek, forest sites had slightly higher mean richness of *E. coli*  
131 clonal groups than produce field sites, while for Hoosic River the pattern was opposite (Fig. S3).

132 *E. coli* in the two watersheds displayed distinct distribution patterns. For Flint Creek, principal  
133 coordinates analysis (PCoA) based on the similarity of *E. coli* clonal groups clustered sampling sites by  
134 land-use; PERMANOVA showed that this clustering is significant ( $p < 0.05$ ; Fig. 2a, Table S3). By  
135 contrast, the sampling sites were not significantly clustered by land-use in PCoA for *E. coli* clonal  
136 groups from Hoosic River (PERMANOVA  $p = 0.63$ ; Fig. 2b, Table S3), indicating a more  
137 homogeneous composition of *E. coli* between produce field and forest in this watershed.

138 **Key soil variables shaping the distribution of *E. coli*.** Moisture, pH, sodium, phosphorus,  
139 barium, manganese, and antimony were included in the canonical correspondence analysis (CCA), after  
140 screening for high levels of covariation (Table S4). CCA revealed different key soil variables driving the  
141 distribution of *E. coli* clonal groups in the two watersheds. Phosphorus and antimony were identified as  
142 the key soil variables ( $p < 0.1$ ) shaping the distribution of *E. coli* clonal groups in Flint Creek, with each  
143 explaining about 10% of the biological variation (Table 1). For Flint Creek, mean phosphorus and  
144 antimony content were higher for soil samples from produce field sites as compared to samples from  
145 forest sites; the difference was significant for phosphorus content, but not for antimony content (Fig.  
146 S4a; Fig. S4b). Moisture was identified as the key soil variable ( $p < 0.1$ ) shaping the distribution of *E.*  
147 *coli* clonal groups in Hoosic River, explaining 8.7% of the biological variation (Table 1); mean moisture  
148 of soil samples from forest sites was slightly higher than mean moisture of samples from produce sites  
149 (Fig. S4c). Overall, 20.3% of variation of *E. coli* clonal group dissimilarity between sites was explained  
150 by soil variables in Flint Creek, which suggests a more important role of environmental selection for *E.*  
151 *coli* from Flint Creek compared to Hoosic River (8.7% biological variation explained).

152           **Dispersal limitation of *E. coli*.** To infer dispersal limitation, we assessed the relationship  
153 between biologic dissimilarity of *E. coli* and geographic distance. Mantel tests showed a weakly  
154 significant correlation between the dissimilarity of *E. coli* clonal groups and geographic distance in Flint  
155 Creek ( $r = 0.16, p = 0.08$ ). By contrast, no significant correlation was observed between the dissimilarity  
156 of *E. coli* clonal groups and geographic distance in the Hoosic River watershed ( $r = -0.02, p = 0.56$ ).  
157 Linear regression analysis further showed that the dissimilarity of *E. coli* clonal groups in Flint Creek  
158 had a very weak linear relationship with geographic distance (Fig. 3a,  $R^2 = 0.027$ , slope =  $2.7 \times 10^{-3}$ ),  
159 while there was no evidence of linear relationship between the dissimilarity of *E. coli* clonal groups and  
160 geographic distance in Hoosic River (Fig. 3b,  $R^2 = 0.0005$ , slope =  $-2 \times 10^{-4}$ ). These results indicate that  
161 the dispersal of *E. coli* in Flint Creek was slightly limited, while *E. coli* in the Hoosic River watershed  
162 was likely not constrained by dispersal limitation.

163           **Wildlife-driven dispersal of *E. coli*.** Four common classes of wildlife vehicles (large nuisance  
164 wildlife species, small mammals, small flocking insectivore/granivores, and migratory bird flocks) were  
165 selected for identifying potential dispersal vehicles of *E. coli* (characteristics of these dispersal vehicles  
166 are detailed in Table 2). By adjusting distances among sampled sites to account for movement  
167 preferences of these four types of wildlife vehicles (i.e., cost-distance or landscape resistance modeling),  
168 we sought to assess whether dispersal associated with wildlife behavior explains the *E. coli* distribution  
169 better than distance alone. As shown in Table 3, the predicted dispersal model was developed based on  
170 the most-likely cost model and attraction model selected for each wildlife vehicle according to their  
171 characteristics. The predicted dispersal model for small mammals was defined to have a biological  
172 riparian corridor effect, no proximity effect, absolute dispersal barriers effect, and no attraction  
173 coefficient. The predicted dispersal model for large nuisance wildlife species was defined to have a  
174 biological riparian corridor effect, strong proximity effect, porous dispersal barriers effect, and habitat



175 quality coefficient. The predicted dispersal model for migratory bird flocks was defined to have a  
176 biological riparian corridor effect, weak proximity effect, no dispersal barriers effect, and area  
177 independent coefficient. The predicted dispersal model for small flocking insectivore/granivores was  
178 defined to have a biological riparian corridor effect, weak proximity effect, absolute dispersal barriers  
179 effect, and area independent coefficient. Definition of these effects can be found in Table 2.

180 Mantel tests showed that none of these dispersal models significantly predicted the composition  
181 of *E. coli* clonal groups in Flint Creek ( $p > 0.05$ ), while two wildlife-driven dispersal models – dispersal  
182 via large nuisance wildlife species and via small flocking insectivore/granivores – were found to be  
183 significantly correlated with the composition of *E. coli* clonal groups in Hoosic River ( $r = 0.21, p < 0.05$ ;  
184  $r = 0.25, p < 0.05$ , respectively) (Fig. 4). Small flocking insectivore/granivores and large nuisance  
185 wildlife species thus were identified as potential vehicles colonized by *E. coli* in the Hoosic River site.  
186 These results indicate that wildlife-driven dispersal played a more important role in shaping the  
187 distribution of *E. coli* in Hoosic River than that in Flint Creek. The observation that cost-distance models  
188 correlated with the distribution of *E. coli* genotypes in Hoosic River better than geographic distance  
189 alone is consistent with some dispersal among sites by the action of wildlife.

190

## 191 **DISCUSSION**

192 *E. coli* has widely been used as an indicator of fecal contamination (37) and potential presence of  
193 other pathogenic enteric bacteria in water (38). *E. coli* comprises a wide spectrum of phenotypes  
194 including harmless commensal as well as distinct pathogenic variants with the capacity to either cause  
195 intestinal or extraintestinal infections in humans and many animals (39). The fecal-oral transmission  
196 route of *E. coli* often involves transient presence in extra-host habitats (e.g., surface water, soil, plant  
197 surfaces), including produce fields (23). Therefore, understanding the ecology of *E. coli* in extra-host

198 habitats will not only provide an improved understanding of *E. coli* interaction with environment, but  
199 will also benefit public health by providing knowledge that can be used to minimizing introduction of *E.*  
200 *coli* and possibly other enteric pathogens into preharvest environments.

201 Environmental stressors such as availability of nutrients and water, presence of toxic molecules,  
202 and large alterations in temperature and moisture can impose fitness cost on *E. coli* and other microbes  
203 (40). Fragmented landscapes with smaller forest and grassland patches expose surface soil to sunlight  
204 and greatly increase daily variation in soil conditions. Reduced forest and grassland cover could also  
205 hinder the movement of organisms, bringing negative demographic and genetic consequences (41). Thus,  
206 in order to disperse to and survive new habitats, *E. coli* needs to overcome those barriers by maintaining  
207 variable survival strategies such as evolving adaptive traits relying on dispersal to rescue local  
208 populations. In this scenario, landscape structure imposes constrains on environmental selection and  
209 dispersal, which is particularly essential for the transmission of *E. coli* among different extra-host  
210 habitats.

211 To quantitatively probe the importance of environmental selection and dispersal in driving the  
212 distribution and composition of *E. coli* in soil under the impact of landscape, we compared the  
213 biogeographic pattern of *E. coli* isolated from two watersheds with distinct landscape patterns (i.e., Flint  
214 Creek, one area with widespread produce fields and limited interaction between produce fields and  
215 forest, and Hoosic River, one heavily forested area with strong interaction between produce fields and  
216 forest). Our data specifically suggest that in the watershed with widespread produce fields and sparse  
217 forest coverage, strong environmental selection caused by soil phosphorus and antimony and slightly  
218 limited dispersal may result in potential local adaptation in *E. coli*. In contrast, in watershed with heavily  
219 forested areas, weak environmental selection and dispersal facilitated by small flocking  
220 insectivore/granivores and large nuisance wildlife may enhance the likelihood of genetic exchange

221 among *E. coli* populations, resulting a relative homogeneous composition between forest and produce  
222 field. This higher level of homogeneity is consistent with greater interaction between produce fields and  
223 forests in the Hoosic River watershed ( $\text{adjacency}_{\text{produce|forest}} = 36\%$ ) compared to Flint Creek  
224 ( $\text{adjacency}_{\text{produce|forest}} = 23\%$ ).

225 **Agricultural practice involving input of phosphorous and antimony in soil may enhance the**  
226 **selective pressure on *E. coli*.** Agricultural activities normally involve cultivation and soil amendments,  
227 which could dramatically change soil organic matter and nutrient pools in comparison to undisturbed  
228 systems (e.g., forest) (42). Consequently, long-term organic and chemical amendments could  
229 dramatically impact the abundance, diversity, and composition of bacterial communities in soil of  
230 agricultural land (43). This is because such alteration of soil properties could trigger selective pressures  
231 on bacteria, sorting the individuals or traits that better cope with modified soil condition, which has been  
232 termed “local adaptation” (23). For example, copper-amendment in agricultural soil has been found to  
233 significantly increase the frequency of copper-resistant Gram-negative bacteria (44). Based on the  
234 results of our study reported here, agricultural practices may have caused selective pressure on soil *E.*  
235 *coli*, partially resulting in the distinct *E. coli* composition between produce fields sites and forest sites.  
236 Consistent with our findings, Dusek et al. (22) observed different population structure of *E. coli* between  
237 cropland and forest, with much lower prevalence of *E. coli* in cropland than forest. The diverse lifestyles  
238 and phenotypes of *E. coli* strains were thought to be caused by population expansion paired with  
239 differential niche adaptation under specific selective pressures in the last 5 million years (39). Our  
240 findings suggest agriculture-stimulated selective pressure contributing to the diversification of *E. coli*.

241 Based on the key soil variables shaping the distribution of *E. coli* in watershed with widespread  
242 produce fields we identified, agriculture-stimulated selective pressure on *E. coli* likely came from  
243 phosphorus and antimony, though physical soil parameters may have also played a role. Phosphorus is

244 one of the soil variables well documented to dramatically change after the conversion of undisturbed  
245 systems to agriculture (42, 45). The input of phosphorus in fertilizer and manure to agricultural systems  
246 have been reported to often exceed the output in harvested crops (46). Consistently, in this study,  
247 phosphorus concentration of soil from produce field sites was significantly higher than that from forest  
248 sites. Phosphorus is a critical nutrient for the growth of bacteria and is part of many biomolecules in  
249 bacterial cells (e.g., DNA, phospholipids, polyphosphates, and ATP). Phosphorus availability could act  
250 as an important selective force driving divergence among bacteria populations. For example, Coleman et  
251 al. (21) identified a number of genes encoding functions related to phosphorus acquisition and  
252 metabolism (e.g., alkaline phosphatase, a pathway for phosphonate utilization, upregulation during  
253 phosphorus-starvation conditions) as significantly enriched in *Prochlorococcus* populations in locations  
254 with lower phosphate concentrations in North Atlantic and North Pacific subtropical gyres. Our finding  
255 suggests that excessive phosphorus in produce field may also yield selective pressure on *E. coli*,  
256 contributing to diversification. However, it is not clear what specific traits the excessive phosphorus may  
257 be selecting on *E. coli*. Future studies using comparative population genomics are needed to better  
258 understand the adaptation of *E. coli* to excessive phosphorus conditions.

259 Another potential environmental factor acting on soil *E. coli* in watershed with widespread  
260 produce fields identified in this study is antimony. Antimony is a toxic metalloid present widely at trace  
261 concentrations in natural soil (47, 48). Its concentration could be elevated or even reach contamination  
262 threshold in agricultural lands due to human activities (49). For example, application of lead arsenate  
263 pesticides in produce field can increase antimony concentration, since antimony is present as a  
264 contaminant in the antimony- and arsenic-containing ores used for pesticide manufacturing (50). In  
265 some areas, past mining activities, such as exploitation of ore minerals which are frequently present with  
266 antimony, arsenic and lead, could be responsible for increased levels of antimony in agricultural fields

267 (51, 52). For the areas studied here, though there is no evidence of past mining activity, average  
268 antimony concentration was found to be higher for soil from produce fields than forests. A previous  
269 study has shown that increased antimony could prevent the growth of *E. coli*, *Bacillus subtilis* and  
270 *Streptococcus aureus*, and may affect nitrogen cycle in soil by changing urease activity under neutral pH  
271 (53). Microbes including *E. coli* have developed various strategies (e.g., efflux system) to cope with the  
272 toxicity of antimony (54, 55). Plasmids contain an operon conferring resistances to antimony as well as  
273 arsenate and arsenite salts have been observed in *E. coli* as early as 1980s (56). With the importance of  
274 antimony in shaping *E. coli* in watershed with widespread produce fields, *E. coli* in this region might  
275 have developed molecular strategies to address antimony stress. However, further functional  
276 experiments on the response of relevant soil *E. coli* to antimony would be needed to test this hypothesis.  
277 Importantly, our findings suggest that *E. coli* populations found in different watersheds and  
278 environments may differ in their adaptive traits, which may impact our ability to control these organisms  
279 throughout the food chain.

280 ***E. coli* in a watershed with high forest coverage may experience weak selective pressure**  
281 **from moisture and proximity effect of forest.** In this study, environmental selection tended to be  
282 weaker on *E. coli* in watershed with higher forest coverage. This might be because, compared to produce  
283 fields, plant cover and shading in forest could moderate perturbations in soil moisture, nutrients and  
284 temperature, thus providing a more favorable and stable condition with fewer environmental stressors  
285 for *E. coli* (4, 22). As previously proposed (4), soil in undisturbed temperate forest could act as potential  
286 habitat for long-period persistent, even resident *E. coli* populations rather than acting as a transient  
287 habitat. Albeit *E. coli* may be exposed to fewer or less intense stressors in undisturbed environments, as  
288 compared to disturbed ones, some factors such as temperature, moisture and nutrients have been shown  
289 to be correlated with *E. coli* density in forest (57, 58). In our study reported here, only moisture was

290 identified as potential selective stressor for *E. coli* in the watershed with high forest coverage. This is  
291 consistent with previous studies that reported *E. coli* to be sensitive to soil desiccation and its relative  
292 density to fluctuate with moisture (4, 59). While further investigation is required to explain how  
293 moisture impacts *E. coli* composition in watersheds with higher forest coverage, we expect *E. coli* in  
294 these areas to be exposed to less environmental stress, providing potentially more favorable growth  
295 conditions for *E. coli* as compared to watersheds with lower forest coverage does. Due to lack of niche  
296 differentiation caused by environmental selection, we observed more homogeneous *E. coli* compositions  
297 between forest and produce field in watershed with higher forest coverage. We also observed that *E. coli*  
298 was much more prevalent in the watershed with higher forest coverage (72%) as compared to the  
299 watershed with lower forest coverage (35%), consistent with previous findings by Dusek et al. (22).

300         The higher prevalence of *E. coli* in the watershed with higher forest coverage might be caused by  
301 proximity effect, which proposes that the likelihood of *E. coli* isolation from surrounding sites such as  
302 produce field increases with the proximity to forests (22). Such a proximity effect is formed by the  
303 spread of *E. coli* out of forests into surrounding areas, given that forest is a vital sink for *E. coli* (4). In  
304 addition, the large adjacency between forest and produce fields in the watershed with higher forest  
305 coverage, which indicates strong direct interactions between the two land covers, may enhance the  
306 proximity effect. Consistent with our findings, Dusek et al. (22) reported that *E. coli* was more prevalent  
307 in a landscape with greater forest coverage; this study specifically showed that *E. coli* was most  
308 prevalent in soils sampled in close proximity (0 to 38 m) of forests, but was up to 90% less prevalent  
309 when forest cover in the 250m radius was less than 7%. In addition to *E. coli*, such proximity effects of  
310 forest have also been reported for *Listeria monocytogenes* and other *Listeria* species. Weller et al. (60)  
311 found that with a 100m increase in the distance of a sampling site from forests, the likelihood of *L.*  
312 *monocytogenes* and other *Listeria* species isolation in croplands decreased by 14% and 16%,

313 respectively.

314 **Watershed landscape could constrain or facilitate the dispersal of soil *E. coli* by influencing**  
315 **the movement of wildlife host.** Wildlife, which is thought to be an important vehicle for transmission  
316 of foodborne pathogens between hosts and locations (36), could enable bacteria to overcome landscape  
317 barriers and make the dispersal of bacteria more active. Several studies have specifically indicated that  
318 wildlife is a major source of *E. coli* in surface waters and may contribute to the contamination of *E. coli*  
319 in rural watersheds and produce fields by defecation (11, 36, 61, 62). Landscape connectivity (i.e., the  
320 degree to which a landscape facilitates or prevents movement of organisms among resource patches) and  
321 particular landscape elements such as the structure of habitat (e.g., riparian corridor, terrestrial land,  
322 waterbody) have also previously been shown to influence dispersal of pathogens (63, 64) and the  
323 movement of wildlife (41). Wildlife-dependent dispersal of *E. coli* would thus be indirectly impacted by  
324 landscape. Our results showed that the dispersal of soil *E. coli* in the watershed with widespread produce  
325 fields was slightly limited, while the dispersal of soil *E. coli* in the watershed with high forest coverage  
326 was facilitated by wildlife, demonstrating the influence of different watershed landscapes on the  
327 dispersal of *E. coli*. These influences may consequently shape the spatial patterns of disease persistence  
328 and incidence associated with pathogenic *E. coli* (65). Consistent with our findings, Mechai et al. (66)  
329 showed evidence of the impact of landscape connectivity on the dispersal patterns of *Borrelia*  
330 *burgdorferi*, particularly rodent-associated strains, which is relevant to the spread of Lyme disease risk  
331 across locations.

332 Based on above notions, our observation here that the dispersal of soil *E. coli* in the watershed  
333 with widespread produce fields was limited could be explained by a combination of different  
334 environmental selection in soil and poor connectivity of agricultural areas, which impedes the movement  
335 of wildlife that disperses *E. coli* (41). By contrast, the dispersal of soil *E. coli* in the watershed with high

336 forest coverage tended to be facilitated by wildlife, largely because forest exhibits better connectivity  
337 and may provide passage and support to the movement of wildlife vehicles of *E. coli*. Besides wildlife, it  
338 is also possible that the dispersal of *E. coli* was directly influenced by the landscape elements of the two  
339 watersheds. Forest and most produce fields in Hoosic River, which is heavily forested, were both located  
340 in a floodplain. By contrast, forest in Flint Creek was in a floodplain but produce fields were not. Since  
341 during periods of high discharge, a floodplain normally experiences flooding, such events could  
342 facilitate the transmission of *E. coli* between forest and produce field particularly in the Hoosic River  
343 watershed.

344 Small flocking insectivore/granivores and large nuisance wildlife were identified as the potential  
345 vehicles for *E. coli* in watershed with high forest coverage in this study. Small flocking  
346 insectivore/granivores (e.g., European starling) tend to have low movement cost in all land-use types  
347 except for open water and heavy urban development areas (67). Large nuisance wildlife (e.g., white  
348 tailed deer or feral swine) tend to have low movement cost in forests, scrublands, grasslands, wooded  
349 wetlands and cultivated croplands, while they can have high movement cost to cross roads (68). Both  
350 classes of wildlife have been previously reported to serve as dispersal vehicles of *E. coli* and have been  
351 considered public health concerns in terms of agricultural contamination. For example, European  
352 starlings, which are considered an invasive species in the United States and a nuisance pest to  
353 agriculture, were proposed to be a potential suitable reservoir and vector of *E. coli* O157:H7, and can  
354 carry and disseminate this human pathogen to cattle (34). In addition, deer feces were reported to  
355 contaminate fresh strawberries, being responsible for an outbreak of *E. coli* O157:H7 infections in  
356 Oregon (35). Forest is a relative stable environment with less disturbance of anthropologic activities,  
357 thus serving as an ideal living habitat for animals including small flocking insectivore/granivores and  
358 large nuisance wildlife (69). Forest could provide easy transport pathways for small flocking



359 insectivore/granivores and large nuisance wildlife to move around, facilitating the dispersal of colonized  
360 *E. coli* among locations.

361 **Conclusion.** By comparing the biogeographic patterns of *E. coli* isolated from two watershed  
362 with distinct landscape characteristics in New York state, we showed that terrestrial landscape could  
363 impact the distribution of *E. coli* by adjusting the importance of environmental selection and dispersal.  
364 Environmental stress, which may contribute to local adaptation, tends to be strong on *E. coli* in  
365 watershed with widespread produce fields. Wildlife-driven dispersal, which could facilitate genetic  
366 exchange, was observed as the major force in shaping *E. coli* in watershed with high forest coverage. As  
367 such, our findings not only highlight the critical role of landscape in driving the biogeographic pattern of  
368 *E. coli* in perspective of ecology, but also open the possibility that the evolutionary forces (e.g., positive  
369 selection, genetic drift, gene flow) driving its diversification vary by watershed landscape as well. In  
370 addition, our study suggests that due to the less intense environmental stress, frequent wildlife-facilitated  
371 dispersal, and the proximity effect of forest on *E. coli*, produce fields in watershed with high forest  
372 coverage may have higher risk in *E. coli* contamination. This information can be proactively applied to  
373 inform spatial modeling of food contamination risk associated with produce fields in watershed, which  
374 can be used to modify pre-harvest product sampling strategies and produce harvest methods to account  
375 for the spatial structure in contamination risk in a produce field. Such methodology development could  
376 improve the prediction of produce contamination risk based on the potential influence of landscape on  
377 transmission of *E. coli* to produce field, benefit the development of trade-off risk assessments of food  
378 contamination, and eventually help to decrease human exposure to pathogenic enteric bacteria.

379

380 **MATERIALS AND METHODS**

381           **Study sites and soil collection.** Two watersheds with different landscape patterns, Flint Creek  
382 and Hoosic River, located in the central New York region, were selected for this study based on  
383 topography and land-cover composition. Flint Creek is an area with widespread vegetable and livestock  
384 production that is sparsely forested (69% produce field, 12% forest by area), whereas the Hoosic River  
385 watershed is a heavily forested area with interspersed produce production (28% produce field, 38%  
386 forest by area). Soil sampling was carried out between September 4 and October 10, 2012 on 7 farms  
387 comprising 16 produce field sites and in 11 forest sites (Fig. 1). For produce fields, two parallel 200 m  
388 transects were laid in each field, perpendicular to the forest boundary. Along each transect, five soil  
389 samples (at approximately 5 cm-depth) were collected at 50 m intervals using sterile scoops (Fisher  
390 Scientific, Hampton, NH) and sterile Whirl-Pak bags (Nasco, Fort Atkinson, WI). Latex gloves and  
391 disposable plastic boot covers (Nasco, Fort Atkinson, WI) were worn for sample collection. Gloves and  
392 boot covers were changed between each site, and gloves were disinfected with 70% ethanol prior to  
393 sample collection. A total of 278 soil samples were collected with 142 and 136 samples collected from  
394 the Flint Creek and the Hoosic River watershed, respectively. All samples were transported to the Food  
395 Safety Lab at Cornell University in an icebox. Samples were stored at  $4 \pm 2^\circ\text{C}$  in dark and processed  
396 within 24 h of collection.

397           **Isolation of *E. coli*.** *E. coli* were isolated from soil samples as previously described (23). Briefly,  
398 8 g sieved soil was diluted 1:10 in EC medium with 4-methylumbelliferyl- $\beta$ ,D-glucuronide broth (EC-  
399 MUG). To maximize genetic diversity among recovered *E. coli* isolates, the suspension was subdivided  
400 among four 96-well microtiter plates for a total of 384 subsamples of approximately 180  $\mu\text{L}$  each.  
401 Microtiter plates were incubated at  $37^\circ\text{C}$ . Bacteria from fluorescent wells were isolated on EC-MUG  
402 agar plates and were further tested with a standard biochemical assay for glutamate decarboxylase and

403 beta-glucuronidase activity. Isolates that were positive for these two tests were presumptively identified  
404 as *E. coli*, which were confirmed by subsequent gene sequencing as detailed below.

405 **DNA extraction, MLST genotyping and clonal groups.** Genomic DNA was extracted from *E.*  
406 *coli* by alkaline lysis of biomass in 50 mM NaOH at 95°C. Two genes (*mdh* and *uidA*) were sequenced  
407 first from all isolates. Then, only the unique two-gene sequence types from each sample were subjected  
408 to additional sequencing in five additional genes (*aspC*, *clpX*, *icd*, *lysP*, *fadD*) by Sanger sequencing,  
409 performed by the Cornell University Life Sciences Core Laboratories Center. Evaluation of sequence  
410 read quality and assembly of forward and reverse reads were performed using Perl scripts, which  
411 iterated runs of phred and CAP3, respectively. Sequences with a probability of error of > 0.005 (Q score  
412 < 23) in terms of read quality were edited manually, where possible, or discarded. Assembled sequences  
413 of each MLST locus were aligned and trimmed to standard base positions matching the *E. coli* K-12  
414 sequence type from the STEC Center website (<http://www.shigatox.net>) (23). Alignments of assembled  
415 sequences for isolates from Flint Creek and Hoosic River are available on GitHub  
416 (<https://github.com/pbergholz/Dispersal-cost-modeling>).

417 The clonal groups of *E. coli* strains for Flint Creek and Hoosic River were determined based on  
418 MLST sequence types using the goeBURST analysis program (70) at single locus variant level.

419 **Remotely sensed data and soil property data.** GPS coordinates of sites were imported into the  
420 Geographical Resources Analysis Support System (GRASS) geographic information system (GIS)  
421 environment. Map layers for land cover (National Land Cover Database [NLCD], 2006) and the digital  
422 elevation model (DEM; Shuttle Radar Topography Mission, 1-arc-second data set) were acquired from  
423 the U.S. Geological Survey (USGS) Earth Explorer geographical data bank  
424 (<http://earthexplorer.usgs.gov/>). Map layers for soil characteristics were acquired from the U.S.  
425 Department of Agriculture Soil Survey Geographic (SSURGO) database

426 (<http://soils.usda.gov/survey/geography/ssurgo/>). Road and hydrologic line graphs were obtained from  
427 the Cornell University Geospatial Information Repository (CUGIR; <http://cugir.mannlib.cornell.edu/>).

428 Percent landcover and adjacency were estimated by using FRAGSTATS v. 3.3 to analyze  
429 landcover within a 2 km buffer surrounding the Flint Creek and Hoosic River, respectively (71). Percent  
430 adjacency was calculated as the proportion pixels in the NLCD map that were adjacent forest and field,  
431 compared to the total of non-self adjacencies in 2 km buffer surrounding the waterway. For example,  
432  $\text{adjacency}_{\text{produce|forest}} = 10\%$  would indicate that 10% of the edges of produce fields abutted forest in a  
433 given area.

434 Organic matter, moisture, pH, aluminium, arsenic, boron, barium, calcium, cadmium, cobalt,  
435 chromium, copper, iron, potassium, magnesium, manganese, molybdenum, sodium, nickel, phosphorus,  
436 lead, sulphur, strontium, and zinc content of soil samples were measured at Cornell Nutrient Analysis  
437 Lab.

438 **Distribution of clonal groups, dispersal limitation, and key soil variables.** The Mann-  
439 Whitney test was used to determine if number of clonal groups differed significantly between soil  
440 samples from produce field sites and forest sites for Flint Creek and Hoosic River. Principal coordinate  
441 analysis (PCoA), as implemented in CANOCO for Windows Version 5.0, was employed to visualize the  
442 distribution of *E. coli* clonal groups among sites, based on Bray-Curtis distance. Permutational  
443 multivariate analysis of variance (PERMANOVA) (72) was employed using the adonis function in R  
444 version 3.6.0's vegan package to test whether the centroids and dispersion of sample groups as defined  
445 by land-use (produce field or forest) are equivalent for all groups based on Bray-Curtis distance of *E.*  
446 *coli* clonal groups in Flint Creek and Hoosic River. PERMANOVA test statistics (F) and p-values were  
447 obtained by 999 permutations.

448 Biological dissimilarity of *E. coli* clonal groups was calculated in Bray-Curtis distance, while  
449 geographic distance was calculated in Euclidean distance based on latitude and longitude coordinates.  
450 Mantel tests were performed in R version 3.6.0 to assess the relationship between the biological  
451 dissimilarity of *E. coli* and geographic distance. Linear regression analysis of biological dissimilarity of  
452 *E. coli* and geographic distance was performed in R version 3.6.0. Dispersal limitation was inferred from  
453  $R^2$  of the linear regression. A value of  $R^2$  closer to 1 suggests stronger dispersal limitation.

454 After screening for high levels of covariation, soil variables ( $r < 0.7$  and  $p < 0.05$  in Pearson's  
455 correlation analysis) were selected for canonical correspondence analysis (CCA). CCA was conducted  
456 in CANOCO for Windows Version 5.0 to quantify the effects of selected soil variables on variation of  
457 the biological dissimilarity of *E. coli*. Key soil variables were determined when  $p < 0.1$ . The Mann-  
458 Whitney test was performed to determine if phosphorous, antimony and moisture differed significantly  
459 between soil samples from produce field sites and forest sites.

460 **Dispersal model formulation and selection.** To predict the dispersal of *E. coli* across watershed  
461 landscapes, multiple dispersal models were developed to describe landscape effects by integrating  
462 remotely sensed and field-collected data into resistance surfaces for wildlife vehicles. Four common  
463 classes of wildlife vehicles including (i) large nuisance wildlife species, (ii) small mammals, (iii) small  
464 flocking insectivore/granivores, and (iv) migratory bird flocks were selected in this study.

465 Predicted dispersal among sites was calculated according to the equation below:

$$466 \quad D_{i,j} = \frac{L_i \times A_j}{C_{i,j}}$$

467 Where  $D_{i,j}$  is the dispersal rate among sites  $i$  and  $j$ ,  $L_i$  is the *E. coli* load from the source site (i.e.,  
468 starting point),  $A_j$  is the attraction (gravity) coefficient of the sink site (i.e., stopping point) to vehicle  
469 and  $C_{i,j}$  is the least-cost distance between sites  $i$  and  $j$ . *E. coli* load  $L_i$  expresses the expected mobility of  
470 *E. coli* from these areas as a function of expected prevalence. Expected prevalence was inferred from

471 random forest analysis of *E. coli* prevalence based on sampling excursions. One load map was generated  
472 per watershed. The attraction (gravity) coefficient  $A_j$  describes the tendency of a dispersal vehicle to  
473 move towards an area on the landscape and expected residence-time of dispersal vehicle after they arrive  
474 at a location. Attraction was primarily a function of percent favored land-cover for each of the vehicles  
475 and interspersions of land-cover types. The least-cost distance  $C_{i,j}$  describes the movement preferences of  
476 a dispersal vehicle in terms of a friction surface (borrowed from circuit theory) that predicts resistance of  
477 the landscape to movement of dispersal vehicles. The cost surfaces were a function of baseline  
478 resistance (dependent on the dispersal vehicle), riparian corridor effect (i.e., the tendency of wildlife to  
479 prefer movement through riparian forests), dispersal barrier effect (i.e., the strength of barriers to  
480 movement, such as major road- and water-ways), and proximity effect (i.e., the strength and type of  
481 edge interactions among forests, produce fields, pasturage, and urban areas). The least-cost distance was  
482 measured as the distance along the path that accrued the least cumulative cost between pairs of  
483 movement start and stop sites. The characteristics of the dispersal vehicles, *E. coli* load model ( $L_i$ ),  
484 attraction model (coefficient  $A_j$ ), cost model (i.e., riparian corridor effect, dispersal barrier effect and  
485 proximity effect) were shown in Table 2, which were summarized on the basis of published literature  
486 (73–84). Based on these characteristics, the most-likely attraction model and cost model were selected  
487 for each class of vehicle, generating the predicted dispersal models (Table 3).

488 For each of the predicted dispersal models for the four classes of wildlife vehicles, an association  
489 matrix  $D_{i,j}$  containing predicted dispersal rates along least cost paths among all pairs of sites was  
490 generated. This was accomplished by using a set of scripts developed in the GRASS GIS ver. 6.4.3  
491 programming environment; Perl scripts were used to automate calculations in the GIS; scripts are  
492 available on GitHub (<https://github.com/pbergholz/Dispersal-cost-modeling>). Mantel tests were  
493 employed to estimate the correlation between predicted dispersal models and biological dissimilarity of

494 *E. coli* clonal groups among sampled sites in each watershed using R version 3.6.0. Statistical  
495 significance of model fits was estimated by 9,999 permutations. The wildlife vehicle for which the  
496 predicted model had the highest significant correlation coefficient was deemed to represent the dominant  
497 dispersal vehicle for *E. coli*.

498

499 **Acknowledgements:** This research was supported by the Center for Produce Safety (research agreement  
500 number 201121642-01, representing a subcontract under Award Number SCB11072 from the California  
501 Department of Food and Agriculture).

502

## 503 REFERENCES

- 504 1. Berges SA, Moore LAS, Isenhardt TM, Schultz RC. 2010. Bird species diversity in riparian buffers,  
505 row crop fields, and grazed pastures within agriculturally dominated watersheds. *Agrofor Syst*  
506 79:97–110.
- 507 2. Borin M, Passoni M, Thiene M, Tempesta T. 2010. Multiple functions of buffer strips in farming  
508 areas. *Eur J Agron* 32:103–111.
- 509 3. Finder RA, Roseberry JL, Woolf A. 1999. Site and landscape conditions at white-tailed  
510 deer/vehicle collision locations in Illinois. *Landsc Urban Plan* 44:77–85.
- 511 4. Byappanahalli MN, Whitman RL, Shively DA, Sadowsky MJ, Ishii S. 2006. Population structure,  
512 persistence, and seasonality of autochthonous *Escherichia coli* in temperate, coastal forest soil  
513 from a Great Lakes watershed. *Environ Microbiol* 8:504–513.
- 514 5. Mostaghimi S, Benham B, Wolfe ML. BSLC: A tool for bacterial source characterization for  
515 watershed management. *Appl Eng Agric*.
- 516 6. Kouznetsov MY, Roodsari R, Pachepsky YA, Shelton DR, Sadeghi AM, Shirmohammadi A,

- 517 Starr JL. 2007. Modeling manure-borne bromide and fecal coliform transport with runoff and  
518 infiltration at a hillslope. *J Environ Manage* 84:336–346.
- 519 7. Lowe WH, McPeck MA. 2014. Is dispersal neutral? *Trends Ecol Evol*. Elsevier Ltd.
- 520 8. Oliver DM, Heathwaite AL, Fish RD, Chadwick DR, Hodgson CJ, Winter M, Butler AJ. 2009.  
521 Scale appropriate modelling of diffuse microbial pollution from agriculture. *Prog Phys Geogr*  
522 *Earth Environ* 33:358–377.
- 523 9. Walsh CJ, Kunapo J. 2009. The importance of upland flow paths in determining urban effects on  
524 stream ecosystems. *J North Am Benthol Soc* 28:977–990.
- 525 10. Wang H, Zhang T, Wei G, Wu L, Wu J, Xu J. 2014. Survival of *Escherichia coli* O157:H7 in  
526 soils under different land use types. *Environ Sci Pollut Res* 21:518–524.
- 527 11. Harmel RD, Karthikeyan R, Gentry T, Srinivasan R. Effects of agricultural management, land use,  
528 and watershed scale on *E. coli* concentrations in runoff and streamflow. *Trans ASABE* 53:1833–  
529 1841.
- 530 12. Foster DR, Motzkin G, Bernardos D, Cardoza J. 2002. Wildlife dynamics in the changing New  
531 England landscape. *J Biogeogr* 29:1337–1357.
- 532 13. Gibbons SM. 2017. Metapopulation theory provides new insight into microbial biogeography.  
533 *Environ Microbiol* 19:849–850.
- 534 14. Nemergut DR, Costello EK, Hamady M, Lozupone C, Jiang L, Schmidt SK, Fierer N, Townsend  
535 AR, Cleveland CC, Stanish L, Knight R. 2011. Global patterns in the biogeography of bacterial  
536 taxa. *Environ Microbiol* 13:135–144.
- 537 15. Nemergut DR, Schmidt SK, Fukami T, O’Neill SP, Bilinski TM, Stanish LF, Knelman JE, Darcy  
538 JL, Lynch RC, Wickey P, Ferrenberg S. 2013. Patterns and processes of microbial community  
539 assembly. *Microbiol Mol Biol Rev* 77:342–356.



- 540 16. Liao J, Cao X, Wang J, Zhao L, Sun J, Jiang D, Huang Y. 2017. Similar community assembly  
541 mechanisms underlie similar biogeography of rare and abundant bacteria in lakes on Yungui  
542 Plateau, China. *Limnol Oceanogr* 62:723–735.
- 543 17. Yashiro E, Pinto-Figueroa E, Buri A, Spangenberg JE, Adatte T, Niculita-Hirzel H, Guisan A,  
544 van der Meer JR. 2016. Local environmental factors drive divergent grassland soil bacterial  
545 communities in the western Swiss Alps. *Appl Environ Microbiol* 82:6303–6316.
- 546 18. Lozupone CA, Knight R. 2007. Global patterns in bacterial diversity. *Proc Natl Acad Sci U S A*  
547 104:11436–11440.
- 548 19. Semenov A V., Franz E, Van Overbeek L, Termorshuizen AJ, Van Bruggen AHC. 2008.  
549 Estimating the stability of *Escherichia coli* O157:H7 survival in manure-amended soils with  
550 different management histories. *Environ Microbiol* 10:1450–1459.
- 551 20. Liao J, Wang J, Huang Y. 2015. Bacterial community features are shaped by geographic location,  
552 physicochemical properties, and oil contamination of soil in main oil fields of China. *Microb Ecol*  
553 70:380–389.
- 554 21. Coleman ML, Chisholm SW. 2010. Ecosystem-specific selection pressures revealed through  
555 comparative population genomics. *Proc Natl Acad Sci U S A* 107:18634–18639.
- 556 22. Dusek N, Hewitt AJ, Schmidt KN, Bergholz PW. 2018. Landscape-scale factors affecting the  
557 prevalence of *Escherichia coli* in surface soil include land cover type, edge interactions, and soil  
558 pH. *Appl Environ Microbiol* 84:e02714-17.
- 559 23. Bergholz PW, Noar JD, Buckley DH. 2011. Environmental patterns are imposed on the  
560 population structure of *Escherichia coli* after fecal deposition. *Appl Environ Microbiol* 77:211–  
561 219.
- 562 24. Fierer N, Jackson RB. 2006. The diversity and biogeography of soil bacterial communities. *Proc*

- 563 Natl Acad Sci U S A 103:626–631.
- 564 25. Forbes AE, Chase JM. 2002. The role of habitat connectivity and landscape geometry in  
565 experimental zooplankton metacommunities. *Oikos* 96:433–440.
- 566 26. Berga M, Östman Ö, Lindström ES, Langenheder S. 2015. Combined effects of zooplankton  
567 grazing and dispersal on the diversity and assembly mechanisms of bacterial metacommunities.  
568 *Environ Microbiol* 17:2275–2287.
- 569 27. Darcy JL, Lynch RC, King AJ, Robeson MS, Schmidt SK. 2011. Global distribution of  
570 *Polaromonas* phylotypes - Evidence for a highly successful dispersal capacity. *PLoS One*  
571 6:e23742.
- 572 28. Biek R, Real LA. 2010. The landscape genetics of infectious disease emergence and spread. *Mol*  
573 *Ecol* 19:3515–3531.
- 574 29. Cushman SA, McKelvey KS, Hayden J, Schwartz MK. 2006. Gene flow in complex landscapes:  
575 testing multiple hypotheses with causal modeling. *Am Nat* 168:486–99.
- 576 30. Storfer A, Murphy MA, Evans JS, Goldberg CS, Robinson S, Spear SF, Dezzani R, Delmelle E,  
577 Vierling L, Waits LP. 2007. Putting the “landscape” in landscape genetics. *Heredity* (Edinb).  
578 Nature Publishing Group.
- 579 31. Jang J, Hur HG, Sadowsky MJ, Byappanahalli MN, Yan T, Ishii S. 2017. Environmental  
580 *Escherichia coli*: ecology and public health implications—a review. *J Appl Microbiol*. Blackwell  
581 Publishing Ltd.
- 582 32. Nandakafle G, Seale T, Flint T, Nepal M, Venter SN, Brözel VS. 2017. Distribution of diverse  
583 *Escherichia coli* between cattle and pasture. *Microbes Environ* 32:226–233.
- 584 33. Chandler DS, Craven JA. 1980. Relationship of soil moisture to survival of *Escherichia coli* and  
585 *Salmonella typhimurium* in soils. *Aust J Agric Res* 31:547–555.

- 586 34. Kauffman MD, LeJeune J. 2011. European Starlings (*Sturnus vulgaris*) challenged with  
587 *Escherichia coli* O157 can carry and transmit the human pathogen to cattle. *Lett Appl Microbiol*  
588 53:596–601.
- 589 35. Laidler MR, Tourdjman M, Buser GL, Hostetler T, Repp KK, Leman R, Samadpour M, Keene  
590 WE. 2013. *Escherichia coli* O157:H7 infections associated with consumption of locally grown  
591 strawberries contaminated by deer. *Clin Infect Dis* 57:1129–1134.
- 592 36. Avery SM, Moore A, Hutchison ML. 2004. Fate of *Escherichia coli* originating from livestock  
593 faeces deposited directly onto pasture. *Lett Appl Microbiol* 38:355–359.
- 594 37. Byappanahalli M, Fowler M, Shively D, Whitman R. 2003. Ubiquity and persistence of  
595 *Escherichia coli* in a Midwestern Coastal Stream. *Appl Environ Microbiol* 69:4549–4555.
- 596 38. Bolster CH, Haznedaroglu BZ, Walker SL. 2009. Diversity in cell properties and transport  
597 behavior among 12 different environmental *Escherichia coli* isolates. *J Environ Qual* 38:465–472.
- 598 39. Leimbach A, Hacker J, Dobrindt U. 2013. *E. coli* as an all-rounder: The thin line between  
599 commensalism and pathogenicity. *Curr Top Microbiol Immunol* 358:3–32.
- 600 40. Ramos JL, Gallegos MT, Marqués S, Ramos-González MI, Espinosa-Urgel M, Segura A. 2001.  
601 Responses of gram-negative bacteria to certain environmental stressors. *Curr Opin Microbiol*  
602 4:166–171.
- 603 41. Shepard DB, Kuhns AR, Dreslik MJ, Phillips CA. 2008. Roads as barriers to animal movement in  
604 fragmented landscapes. *Anim Conserv* 11:288–296.
- 605 42. Compton JE, Boone RD. 2000. Long-term impacts of agriculture on soil carbon and nitrogen in  
606 New England forests. *Ecology* 81:2314–2330.
- 607 43. Chaudhry V, Rehman A, Mishra A, Chauhan PS, Nautiyal CS. 2012. Changes in bacterial  
608 community structure of agricultural land due to long-term organic and chemical amendments.

- 609 Microb Ecol 64:450–460.
- 610 44. Berg J, Tom-Petersen A, Nybroe O. 2005. Copper amendment of agricultural soil selects for  
611 bacterial antibiotic resistance in the field. *Lett Appl Microbiol* 40:146–151.
- 612 45. Cambardella CA, Elliott ET. 1994. Carbon and nitrogen dynamics of soil organic matter fractions  
613 from cultivated grassland soils. *Soil Sci Soc Am J* 58:123–130.
- 614 46. Sharpley AN. 1995. Soil phosphorus dynamics: agronomic and environmental impacts. *Ecol Eng*  
615 5:261–279.
- 616 47. Li J, Wang Q, Oremland RS, Kulp TR, Rensing C, Wang G. 2016. Microbial antimony  
617 biogeochemistry: Enzymes, regulation, and related metabolic pathways. *Appl Environ Microbiol*  
618 82:5482–5495.
- 619 48. Steely S, Amarasiriwardena D, Xing B. 2007. An investigation of inorganic antimony species and  
620 antimony associated with soil humic acid molar mass fractions in contaminated soils. *Environ*  
621 *Pollut* 148:590–598.
- 622 49. Tóth G, Hermann T, Da Silva MR, Montanarella L. 2016. Heavy metals in agricultural soils of  
623 the European Union with implications for food safety. *Environ Int* 88:299–309.
- 624 50. Wagner SE, Peryea FJ, Filby RA. 2003. Antimony impurity in lead arsenate insecticide enhances  
625 the antimony content of old orchard soils. *J Environ Qual* 32:736–738.
- 626 51. Álvarez-Ayuso E, Otones V, Murciego A, García-Sánchez A, Regina IS. 2012. Antimony, arsenic  
627 and lead distribution in soils and plants of an agricultural area impacted by former mining  
628 activities. *Sci Total Environ* 439:35–43.
- 629 52. Hammel W, Debus R, Steubing L. 2000. Mobility of antimony in soil and its availability to plants.  
630 *Chemosphere* 41:1791–1798.
- 631 53. An YJ, Kim M. 2009. Effect of antimony on the microbial growth and the activities of soil

- 632 enzymes. *Chemosphere* 74:654–659.
- 633 54. Filella M, Belzile N, Lett MC. 2007. Antimony in the environment: A review focused on natural  
634 waters. III. Microbiota relevant interactions. *Earth-Science Rev* 80:195–217.
- 635 55. Carlin A, Shi W, Dey S, Rosen BP. 1995. The ars operon of *Escherichia coli* confers arsenical  
636 and antimonial resistance. *J Bacteriol* 177:981–986.
- 637 56. Silver S, Budd K, Leahy KM, Shaw W V, Hammond D, Novick RP, Willsky GR, Malamy MH,  
638 Rosenberg H. 1981. Inducible plasmid-determined resistance to arsenate, arsenite, and antimony  
639 (III) in *Escherichia coli* and *Staphylococcus aureus*. *J Bacteriol* 146:983–96.
- 640 57. Carrillo M, Estrada E, Hazen TC. 1985. Survival and enumeration of the fecal indicators  
641 *Bifidobacterium adolescentis* and *Escherichia coli* in a tropical rain forest watershed. *Appl*  
642 *Environ Microbiol* 50:468–476.
- 643 58. Tate RL. 1978. Cultural and environmental factors affecting the longevity of *Escherichia coli* in  
644 *Histosols*. *Appl Environ Microbiol* 35:925–9.
- 645 59. Zhang Q, Yan T. 2012. Correlation of intracellular trehalose concentration with desiccation  
646 resistance of soil *Escherichia coli* populations. *Appl Environ Microbiol* 78:7407–7413.
- 647 60. Weller D, Shiwakoti S, Bergholz P, Grohn Y, Wiedmann M, Strawn LK. 2016. Validation of a  
648 previously developed geospatial model that predicts the prevalence of *Listeria monocytogenes* in  
649 New York State produce fields. *Appl Environ Microbiol* 82:797–807.
- 650 61. Casarez EA, Pillai SD, Mott JB, Vargas M, Dean KE, Di Giovanni GD. 2007. Direct comparison  
651 of four bacterial source tracking methods and use of composite data sets. *J Appl Microbiol*  
652 103:350–364.
- 653 62. Parajuli PB, Mankin KR, Barnes PL. 2009. Source specific fecal bacteria modeling using soil and  
654 water assessment tool model. *Bioresour Technol* 100:953–963.

- 655 63. Tischendorf L, Fahrig L. 2000. On the usage and measurement of landscape connectivity. *Oikos*  
656 90:7–19.
- 657 64. Plantegenest M, Le May C, Fabre F. 2007. Landscape epidemiology of plant diseases. *J R Soc*  
658 *Interface* 4:963–972.
- 659 65. Thrall PH, Burdon JJ. 1997. Host-pathogen dynamics in a metapopulation context: The ecological  
660 and evolutionary consequences of being spatial. *J Ecol* 85:743.
- 661 66. Mechai S, Margos G, Feil EJ, Lindsay LR, Michel P, Kotchi SO, Ogden NH. 2018. Evidence for  
662 an effect of landscape connectivity on *Borrelia burgdorferi sensu stricto* dispersion in a zone of  
663 range expansion. *Ticks Tick Borne Dis* 9:1407–1415.
- 664 67. Shepard ELC, Wilson RP, Rees WG, Grundy E, Lambertucci SA, Vosper SB. 2013. Energy  
665 landscapes shape animal movement ecology. *Am Nat* 182:298–312.
- 666 68. Putman RJ. 1997. Deer and road traffic accidents: Options for management. *J Environ Manage*  
667 51:43–57.
- 668 69. Robinson SK, Yahner RH. 1997. Eastern deciduous forests: Ecology and wildlife conservation. *J*  
669 *Wildl Manage* 61:1445.
- 670 70. Francisco AP, Bugalho M, Ramirez M, Carriço JA. 2009. Global optimal eBURST analysis of  
671 multilocus typing data using a graphic matroid approach. *BMC Bioinformatics* 10:152.
- 672 71. FRAGSTATS: Spatial Pattern Analysis Program for Categorical Maps.
- 673 72. Anderson MJ, Walsh DCI. 2013. PERMANOVA, ANOSIM, and the Mantel test in the face of  
674 heterogeneous dispersions: What null hypothesis are you testing? *Ecol Monogr* 83:557–574.
- 675 73. Bruun M, Smith HG. 2003. Landscape composition affects habitat use and foraging flight  
676 distances in breeding European starlings. *Biol Conserv* 114:179–187.
- 677 74. Minderman J, Reid JM, Hughes M, Denny MJH, Hogg S, Evans PGH, Whittingham MJ. 2010.

- 678 Novel environment exploration and home range size in starlings *Sturnus vulgaris*. Behav Ecol  
679 21:1321–1329.
- 680 75. Getz LL, Mcguire B. 2008. Factors influencing movement distances and home ranges of the  
681 short-tailed shrew (*Blarina brevicauda*). Northeast Nat 15:293–302.
- 682 76. Wang M, Grimm V. 2007. Home range dynamics and population regulation: An individual-based  
683 model of the common shrew *Sorex araneus*. Ecol Modell 205:397–409.
- 684 77. Morales JM, Moorcroft PR, Matthiopoulos J, Frair JL, Kie JG, Powell RA, Merrill EH, Haydon  
685 DT. 2010. Building the bridge between animal movement and population dynamics. Philos Trans  
686 R Soc B Biol Sci 365:2289–2301.
- 687 78. Brandl MT. 2006. Fitness of human enteric pathogens on plants and implications for food safety.  
688 Annu Rev Phytopathol 44:367–392.
- 689 79. Blanchong JA, Samuel MD, Scribner KT, Weckworth B V, Langenberg JA, Filcek KB. 2008.  
690 Landscape genetics and the spatial distribution of chronic wasting disease. Biol Lett 4:130–133.
- 691 80. Somarelli JA, Makarewicz JC, Sia R, Simon R. 2007. Wildlife identified as major source of  
692 *Escherichia coli* in agriculturally dominated watersheds by BOX A1R-derived genetic  
693 fingerprints. J Environ Manage 82:60–65.
- 694 81. Lam TTY, Ip HS, Ghedin E, Wentworth DE, Halpin RA, Stockwell TB, Spiro DJ, Dusek RJ,  
695 Bortner JB, Hoskins J, Bales BD, Yparraguirre DR, Holmes EC. 2012. Migratory flyway and  
696 geographical distance are barriers to the gene flow of influenza virus among North American  
697 birds. Ecol Lett 15:24–33.
- 698 82. Kreakie BJ, Fan Y, Keitt TH. 2012. Enhanced migratory waterfowl distribution modeling by  
699 inclusion of depth to water table data. PLoS One 7:e30142.
- 700 83. Carlson JC, Engeman RM, Hyatt DR, Gilliland RL, DeLiberto TJ, Clark L, Bodenchuk MJ, Linz

701 GM. 2011. Efficacy of European starling control to reduce *Salmonella enterica* contamination in  
702 a concentrated animal feeding operation in the Texas panhandle. BMC Vet Res 7.  
703 84. Carlson JC, Franklin AB, Hyatt DR, Pettit SE, Linz GM. 2011. The role of starlings in the spread  
704 of *Salmonella* within concentrated animal feeding operations. J Appl Ecol 48:479–486.

705

## 706 **FIGURE LEGENDS**

707 **FIG 1** Sampling maps of (a) Flint Creek and (b) Hoosic River. Red dots indicate the sampling sites  
708 within each watershed. Map layers for land cover (National Land Cover Database [NLCD], 2006) were  
709 acquired from the U.S. Geological Survey (USGS) Earth Explorer geographical data bank  
710 (<http://earthexplorer.usgs.gov/>).

711 **FIG 2** PCoA plots of *E. coli* clonal groups of sites in (a) Flint Creek (FC) and (b) Hoosic River (HR).  
712 Green dots indicated forest sites; orange dots indicated produce field sites; Green circle indicated cluster  
713 of forest sites; orange circle indicated cluster of produce field sites. *p* value of permutational multivariate  
714 analysis of variance (PERMANOVA) test is shown; “\*” indicates the clustering of sampling sites by  
715 land-use is significant at  $p < 0.05$ . (a) PCo Axis 1 and 2 explained 15.92% and 11.84%, respectively, of  
716 the variation of *E. coli* clonal groups for Flint Creek. (b) PCo Axis 1 and 2 explained 16.11% and  
717 13.06%, respectively, of the variation of *E. coli* clonal groups for Hoosic River.

718 **FIG 3** Linear relationship between biological dissimilarity of *E. coli* clonal groups and geographical  
719 distance for (a) Flint Creek (FC) and (b) Hoosic River (HR). The biological dissimilarity of *E. coli*  
720 clonal groups was calculated as Bray–Curtis distance. Geographical distance was calculated in  
721 Euclidean distance. Linear regression line is in grey; shaded area indicates 95% confidence region;  $R^2$   
722 indicates the variability explained by fitted linear regression model and the formula of the linear  
723 relationship is shown.



724 **FIG 4** Mantel test result of wildlife-driven dispersal models and composition of *E. coli* clonal groups for  
725 Flint Creek and Hoosic River. M106, M377, M459, and M556 on the x-axis are the identification  
726 numbers of the predicted dispersal models for small mammals, large nuisance wildlife, migratory bird  
727 flocks, and small flocking insectivore/granivores, respectively. Examples of each wildlife vehicle type  
728 are also shown. The description of the predicted dispersal model for each wildlife vehicle is detailed in  
729 Table 3. Significant  $p$  values ( $p < 0.05$ ) are denoted by “\*”.

**TABLE 1** Effects of selected soil variables on the composition of *E. coli* clonal groups.

| Variables  | Flint Creek                                   |                              | Hoosic River                                  |                              |
|------------|-----------------------------------------------|------------------------------|-----------------------------------------------|------------------------------|
|            | % biological variation explained <sup>a</sup> | <i>p</i> -value <sup>b</sup> | % biological variation explained <sup>a</sup> | <i>p</i> -value <sup>b</sup> |
| Phosphorus | 10.3                                          | <b>0.098</b>                 | 7.1                                           | 0.558                        |
| Antimonies | 10                                            | <b>0.02</b>                  | 7.2                                           | 0.616                        |
| Manganese  | 8.3                                           | 0.376                        | 7                                             | 0.592                        |
| pH         | 7.7                                           | 0.554                        | 7.5                                           | 0.51                         |
| Sodium     | 8.2                                           | 0.434                        | 7.2                                           | 0.616                        |
| Barium     | 7.3                                           | 0.588                        | 8.3                                           | 0.2                          |
| Moisture   | 8.3                                           | 0.458                        | 8.7                                           | <b>0.049</b>                 |

<sup>a</sup>The percentage of biological variation explained by a given soil variable

<sup>b</sup>Significant values ( $p < 0.1$ ) are in bold.

**TABLE 2** Basic dispersal model characteristics

| Class                                                                | Description                                                                                                                                                         |
|----------------------------------------------------------------------|---------------------------------------------------------------------------------------------------------------------------------------------------------------------|
| <b>Dispersal vehicles<sup>a</sup></b>                                |                                                                                                                                                                     |
| LT: Large nuisance wildlife species (e.g. "deer" or "feral swine")   | Forests, scrublands, grasslands, wooded wetlands and cultivated croplands impose low movement costs, roads impose increased movement costs based on census category |
| ST: Small mammals (e.g. "shrews", "voles" and "mice")                | Light urban development, grassland and scrublands impose low movement costs, roads impose increased movement costs based on census category                         |
| LB: Small flocking insectivore/granivores (e.g., "starlings")        | Open water and heavy urban development are higher cost, all other movement costs are low                                                                            |
| MB: Migratory bird flocks (e.g. "Canada goose")                      | Heavy urban development imposes higher cost, all other movement costs are low.                                                                                      |
| <b>Riparian corridor</b> (movement costs are reduced by half)        |                                                                                                                                                                     |
| Adjacency                                                            | All land parcels that overlap a 100 m zone around the main river/creek                                                                                              |
| Distance                                                             | Land within 100 m of the main river/creek                                                                                                                           |
| Biological                                                           | Land below the 50 yr flood height for the main river/creek and adjacent wetlands                                                                                    |
| None                                                                 | No riparian corridor effect                                                                                                                                         |
| <b>Dispersal barriers</b>                                            |                                                                                                                                                                     |
| Absolute                                                             | Major roads and waterways are absolute barriers (movement cost 40,000 per pixel)                                                                                    |
| Porous                                                               | Major roads and waterways are porous barriers (movement cost 200 per pixel)                                                                                         |
| None                                                                 | No barrier effect                                                                                                                                                   |
| <b>Proximity effects</b> (specifics vary by vehicle)                 |                                                                                                                                                                     |
| Strong                                                               | Nearness to high quality habitat substantially reduces movement cost                                                                                                |
| Weak                                                                 | Nearness to high quality habitat somewhat reduces movement cost                                                                                                     |
| None                                                                 | No benefit of proximity to good cover                                                                                                                               |
| <b>Attraction (gravity) coefficients</b> (specifics vary by vehicle) |                                                                                                                                                                     |
| Habitat Quality                                                      | Proximity, interspersed and area of high quality habitat increase the chances that <i>E. coli</i> will be deposited                                                 |
| Reduced Habitat Effect                                               | Effect of high quality habitat is reduced by half                                                                                                                   |
| Area Independent                                                     | As habitat quality model, but area of high quality habitat does not impact the result                                                                               |
| None                                                                 | Attraction does not influence dispersal                                                                                                                             |
| <b>Load (source) coefficient</b>                                     |                                                                                                                                                                     |
| <i>E. coli</i> load estimation                                       | Areas close to forest or pasture-class landcover are higher load.                                                                                                   |

<sup>a</sup>Conceptual models are based on published literature (73-84).

**TABLE 3** The predicted dispersal model for each wildlife vehicle

| Vehicles                                   | Most-likely cost model <sup>a</sup> |                   |                    | Most-likely attraction model (coefficient) <sup>b</sup> |
|--------------------------------------------|-------------------------------------|-------------------|--------------------|---------------------------------------------------------|
|                                            | Riparian corridor                   | Proximity effects | Dispersal barriers |                                                         |
| ST (Small mammals)                         | Biological                          | None              | Absolute           | None                                                    |
| LT (Large nuisance wildlife species)       | Biological                          | Strong            | Porous             | Habitat Quality                                         |
| MB (Migratory bird flocks)                 | Biological                          | Weak              | None               | Area Independent                                        |
| LB (Small flocking insectivore/granivores) | Biological                          | Weak              | Absolute           | Area Independent                                        |

<sup>a</sup>Cost model was developed based on three factors, riparian corridor, proximity effects, and dispersal barriers. Definition of the three factors can be found in Table 2. The most-likely cost model was selected based on the characteristics of each wildlife vehicle (Table 2).

<sup>b</sup>Definition of classes of attraction model can be found in Table S5. The most-likely attraction model was selected based on the characteristics of each wildlife vehicle (Table 2).

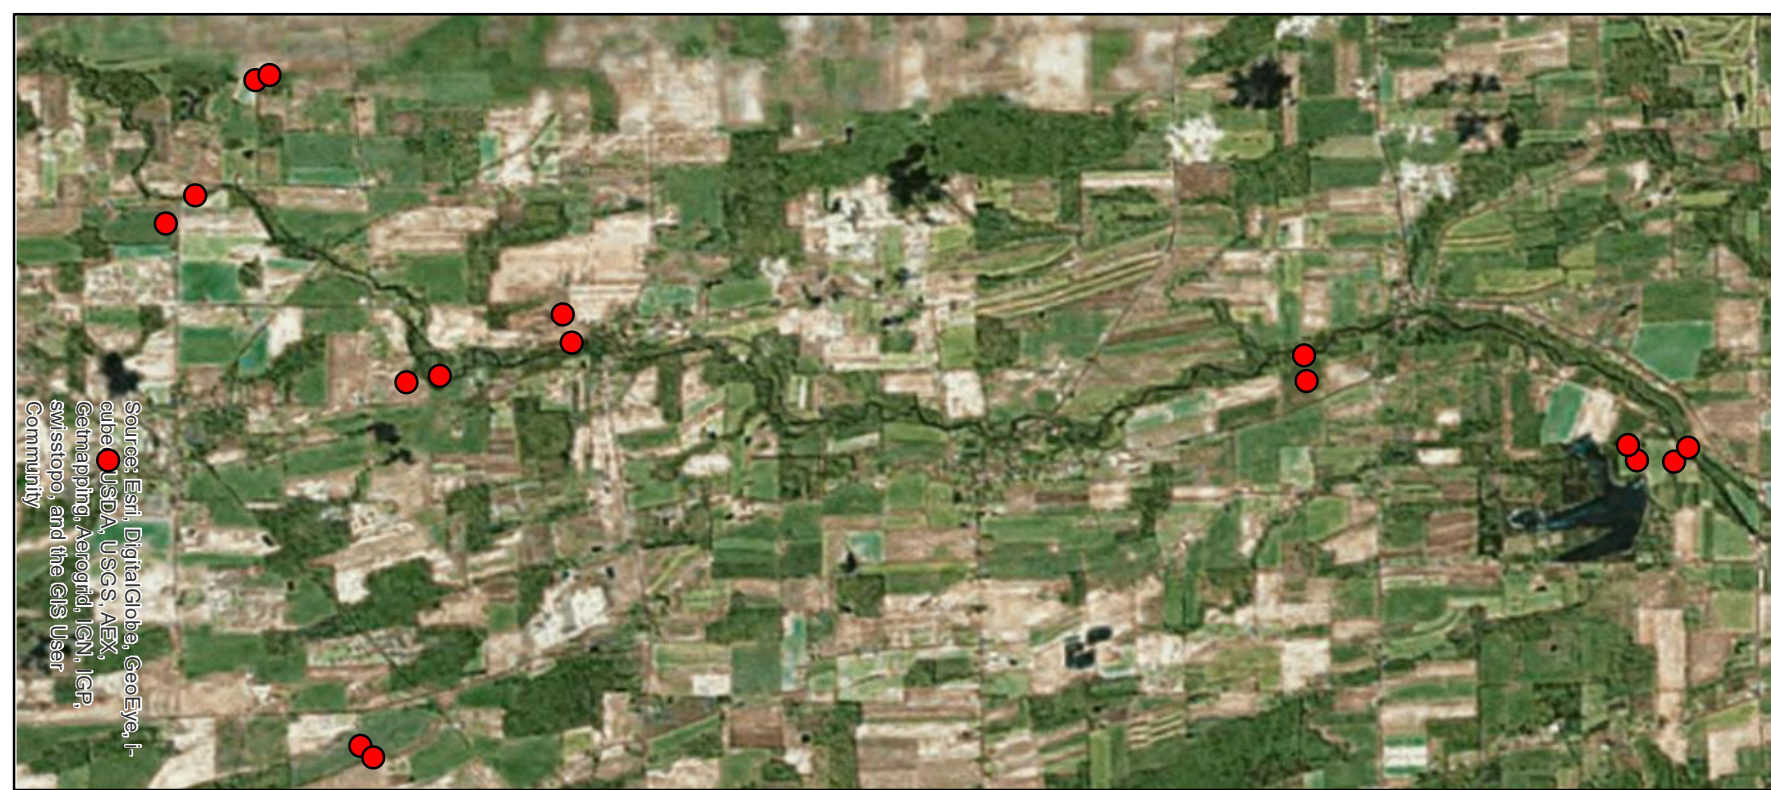

**(A) Flint Creek**

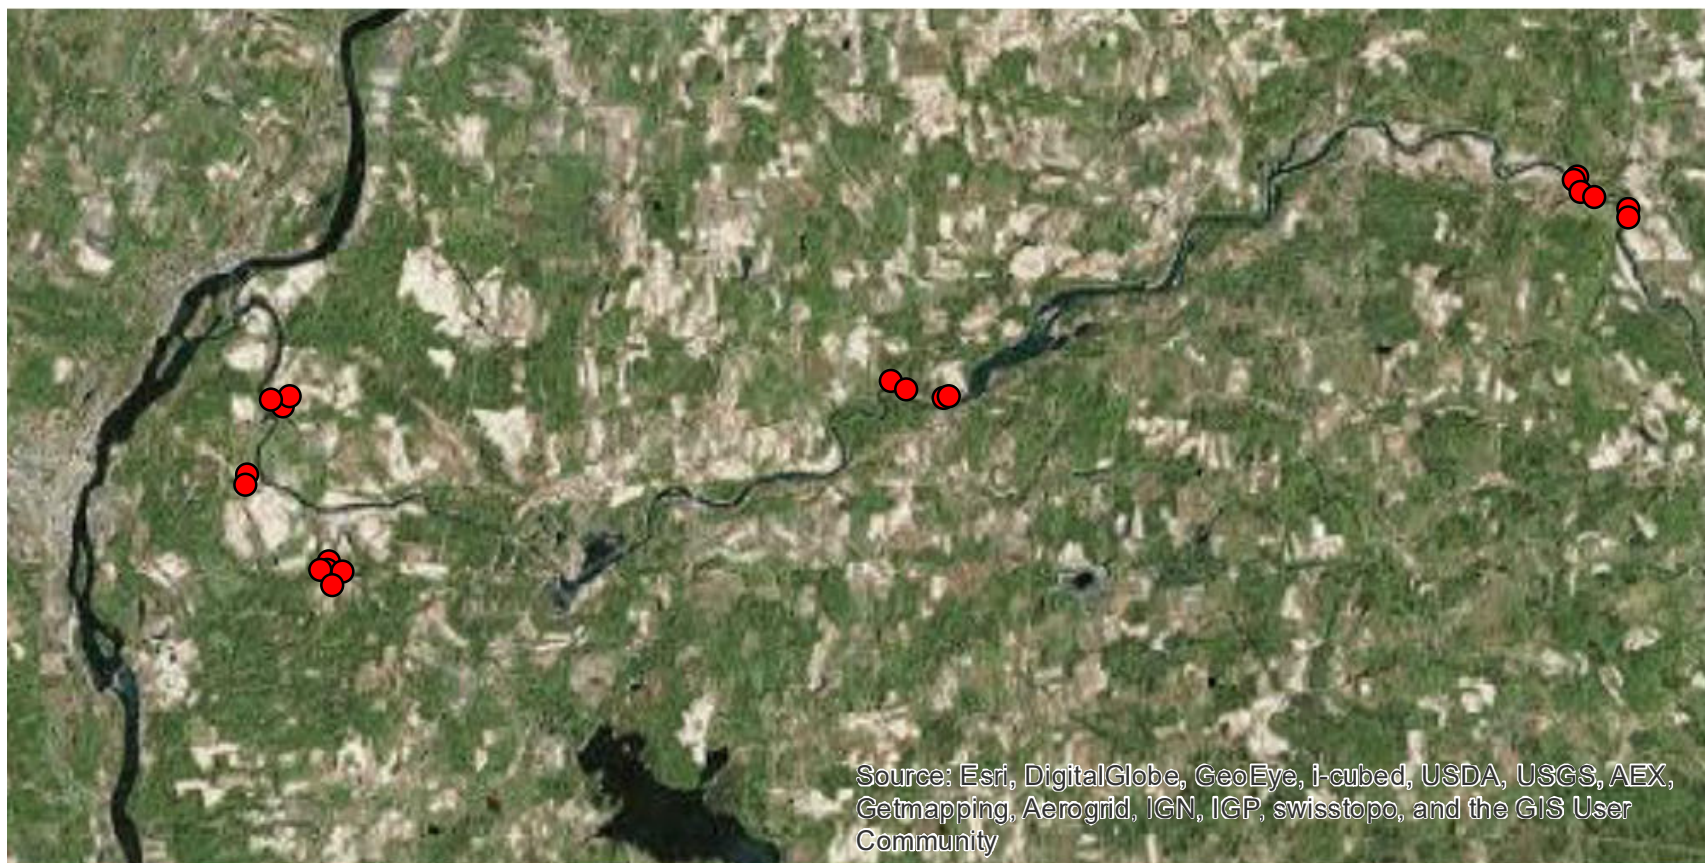

**(B) Hoosic River**

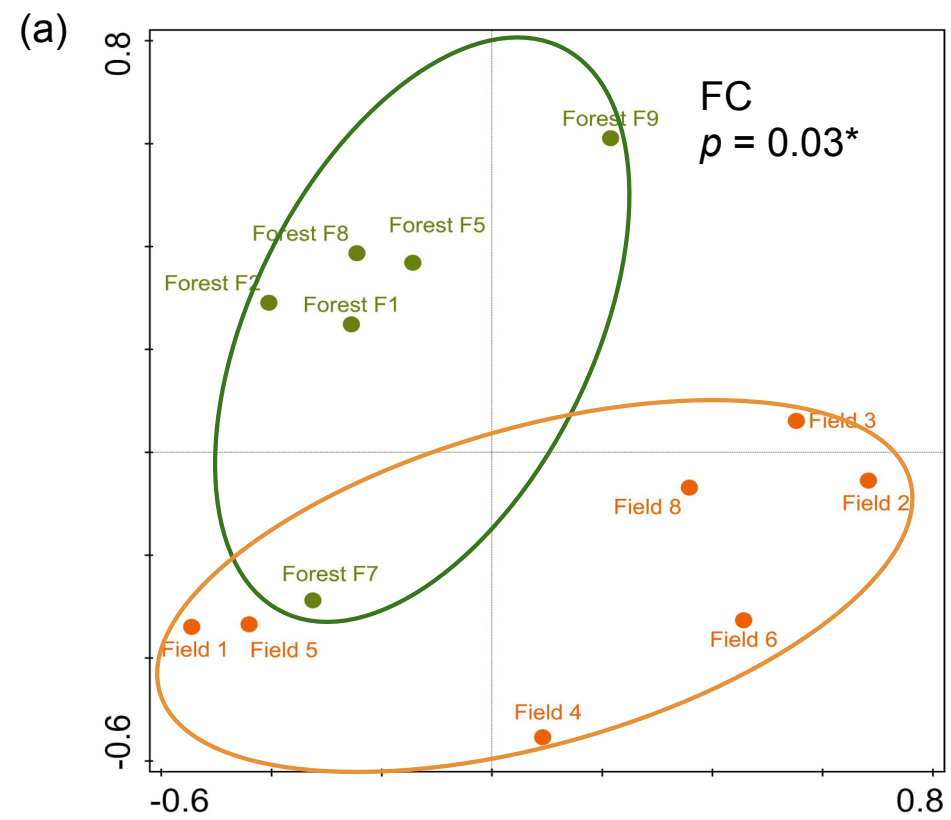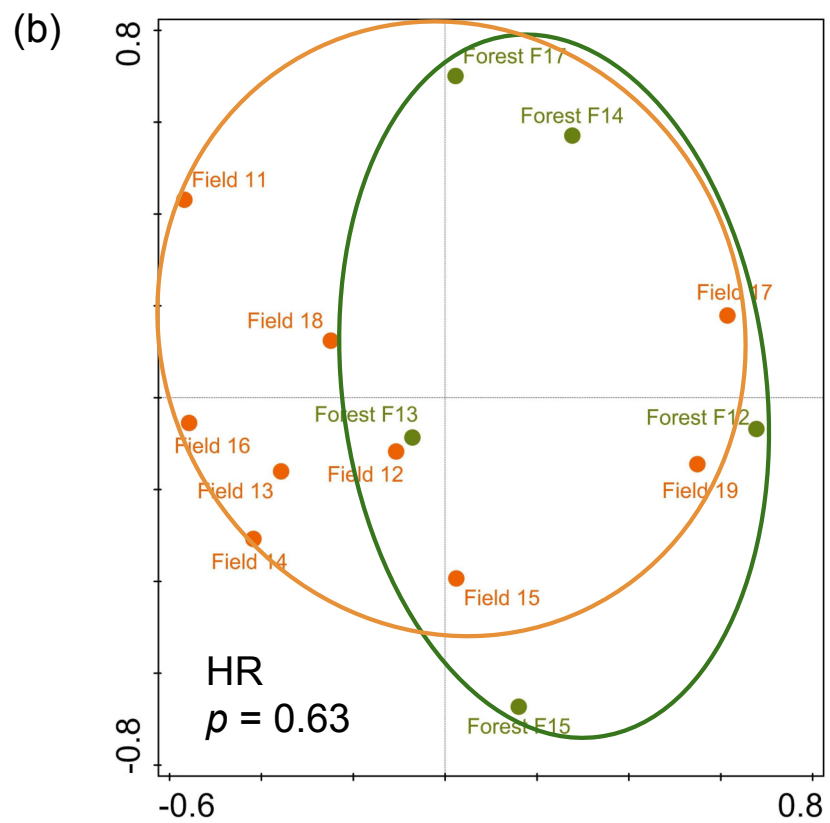

**(a)**

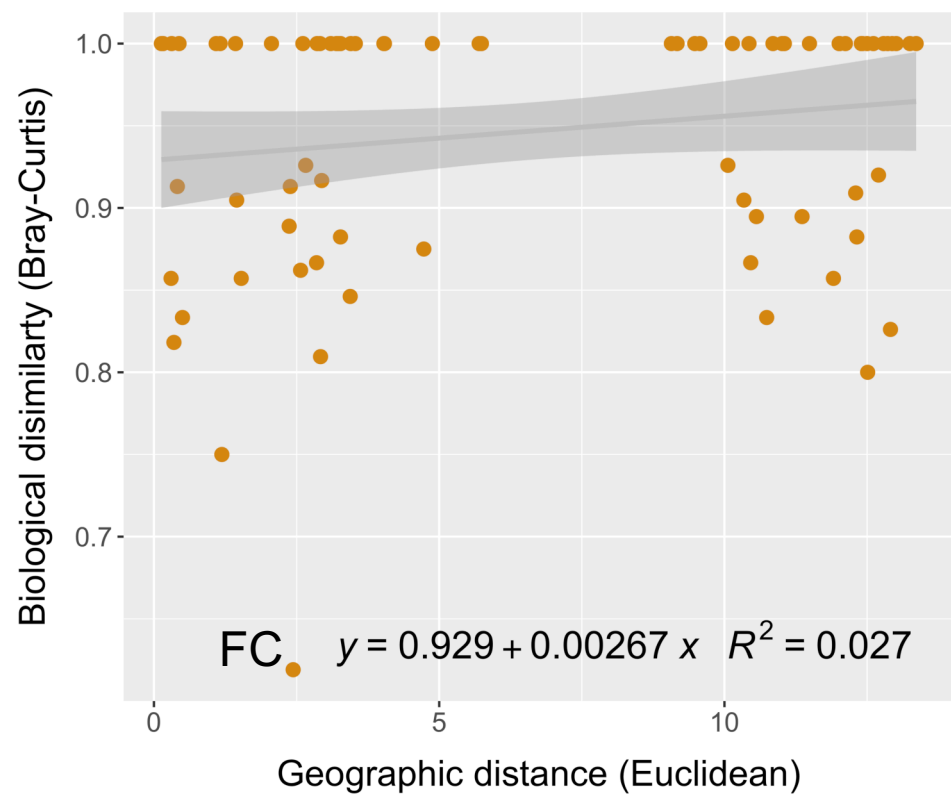

**(b)**

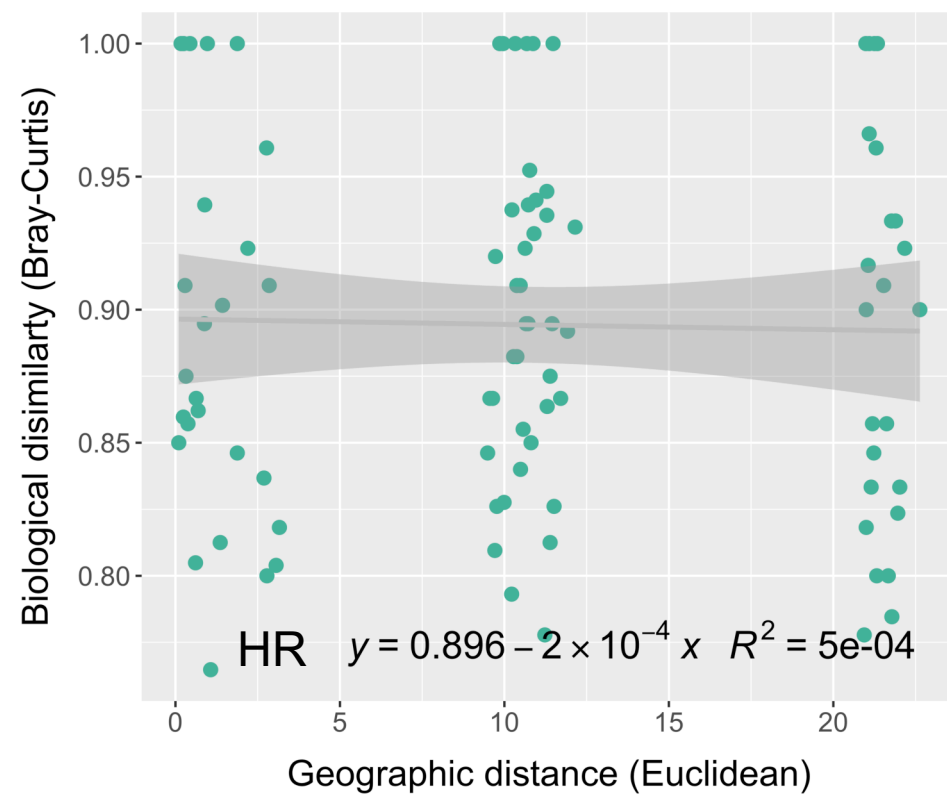

Composition of *E. coli*

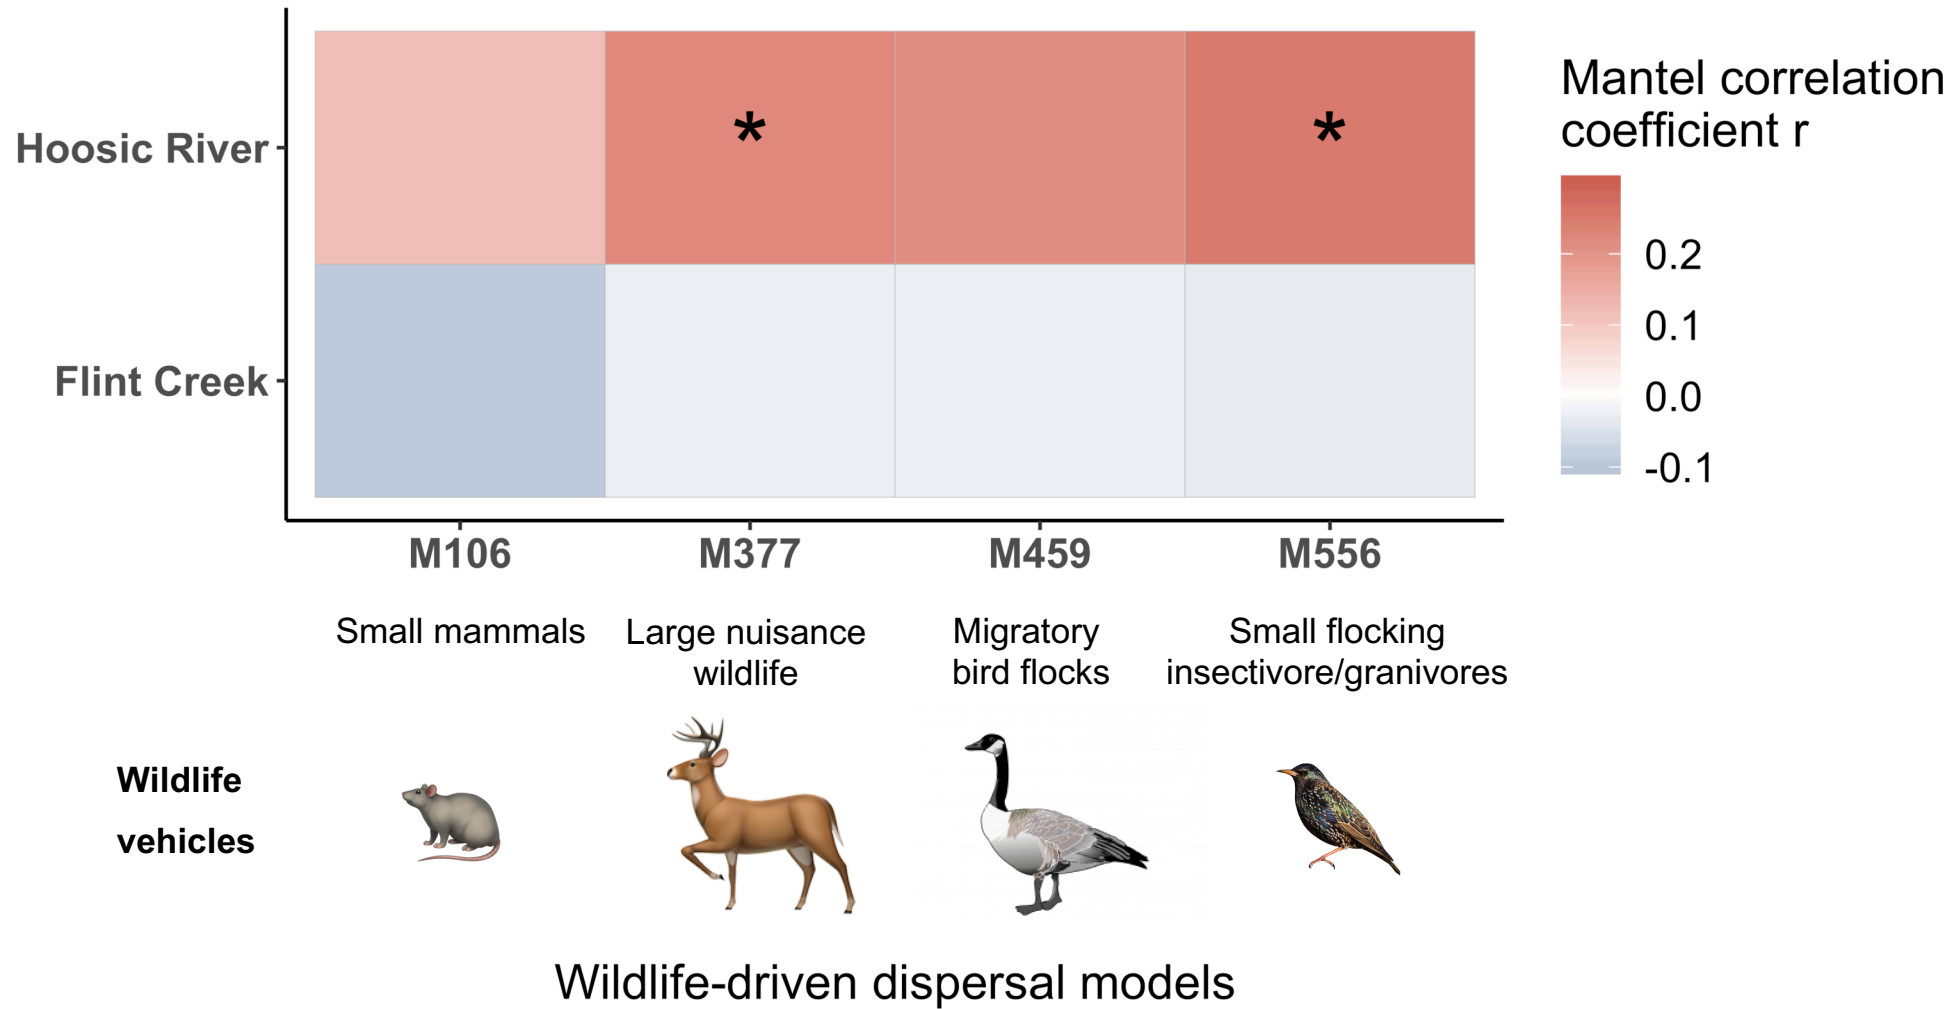

Source: https://www.biorxiv.org/content/10.1101/2020.06.30.181495v1.full.pdf
